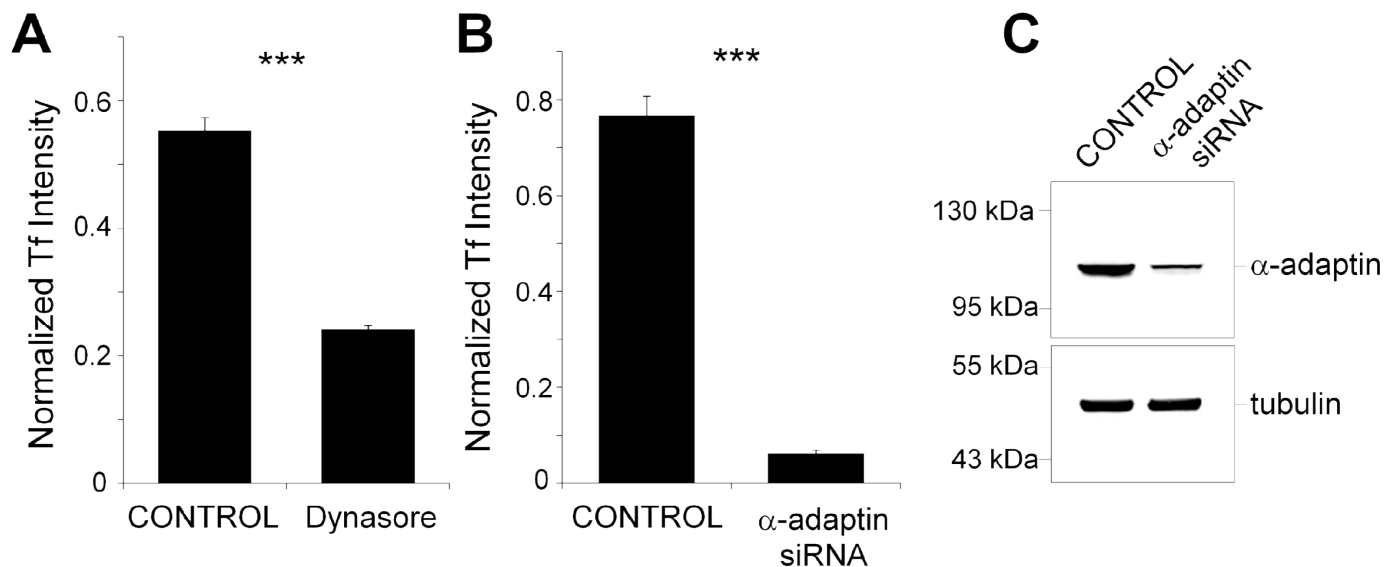

**Fig S1. Silencing  $\alpha$ -adaptin subunit of AP2 complex or inhibition of GTPase dynamin significantly reduces transferrin uptake.** HeLa cells overexpressing FGFR2-GFP were either incubated for 30 minutes in the presence or absence of Dynasore inhibitor (A), or treated with  $\alpha$ -adaptin siRNA (B). Following incubation with transferrin-Alexa-Fluor-546 (Tf) for 15 minutes at 37°C, cells were rinsed, fixed and analysed by epifluorescence microscopy. The quantification of Tf fluorescence intensity shows that both Dynasore activity and  $\alpha$ -adaptin siRNA treatment significantly reduce transferrin entry (mean  $\pm$  s.e.m.,  $n=26$  cells in (A),  $n=24$  cells in (B) (\* $P<0.05$ ; \*\* $P<0.01$ ; \*\*\* $P<0.001$ ). (C) Western blot of lysates from HeLa cells transfected with  $\alpha$ -adaptin siRNA and probed with anti- $\alpha$ -adaptin antibody shows potent silencing (mean  $\pm$  s.e.m.,  $n=3$  experiments).

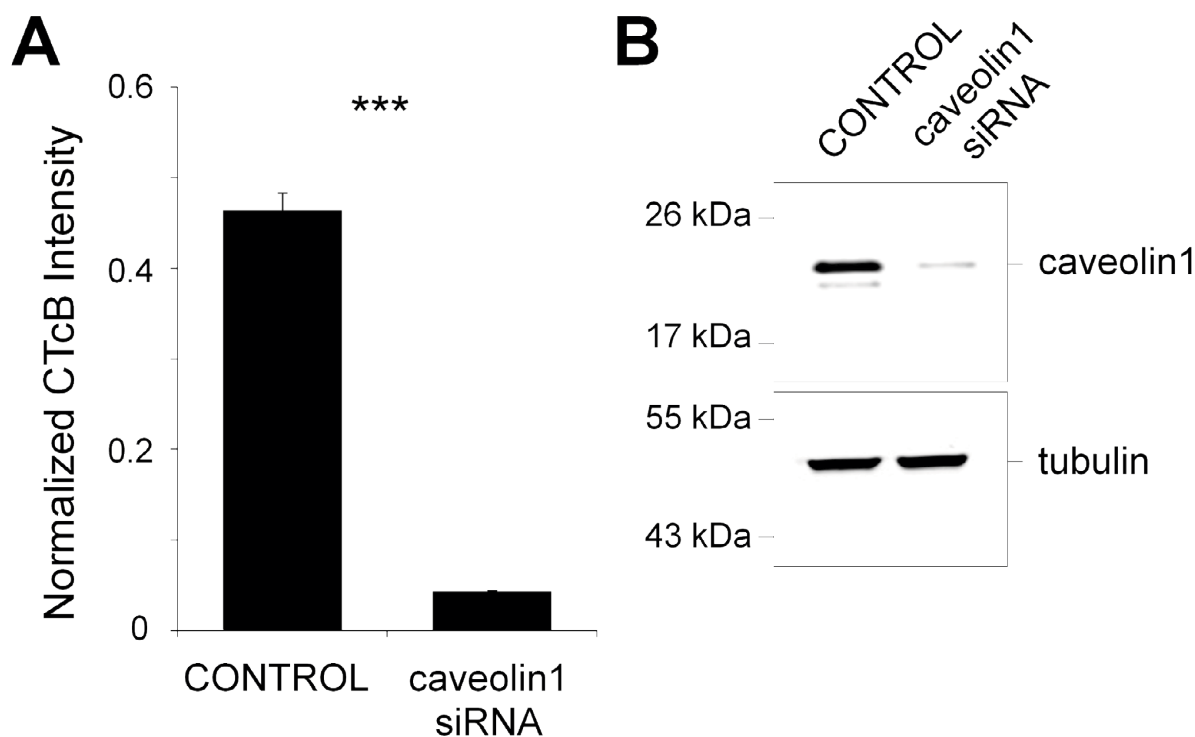

**Fig S2. Silencing of caveolin1 leads to a significant reduction of cholera toxinB uptake.** (A) HeLa cells overexpressing FGFR2-GFP were treated with caveolin1 siRNA. Following incubation with cholera toxinB-Alexa-Fluor-555 (CTcB) for 15 minutes at 37°C, cells were rinsed, fixed and analysed in epifluorescence microscopy. The quantification of CTcB fluorescence intensity shows that caveolin1 siRNA treatment leads to a significant reduction in cholera toxin uptake (mean  $\pm$  s.e.m.,  $n=15$  cells; \* $P<0.05$ ; \*\* $P<0.01$ ; \*\*\* $P<0.001$ ). (B) Western blot of lysates from HeLa cells transfected with caveolin1 siRNA and probed with anti cav1 antibody shows potent silencing (mean  $\pm$  s.e.m.,  $n=3$  experiments).

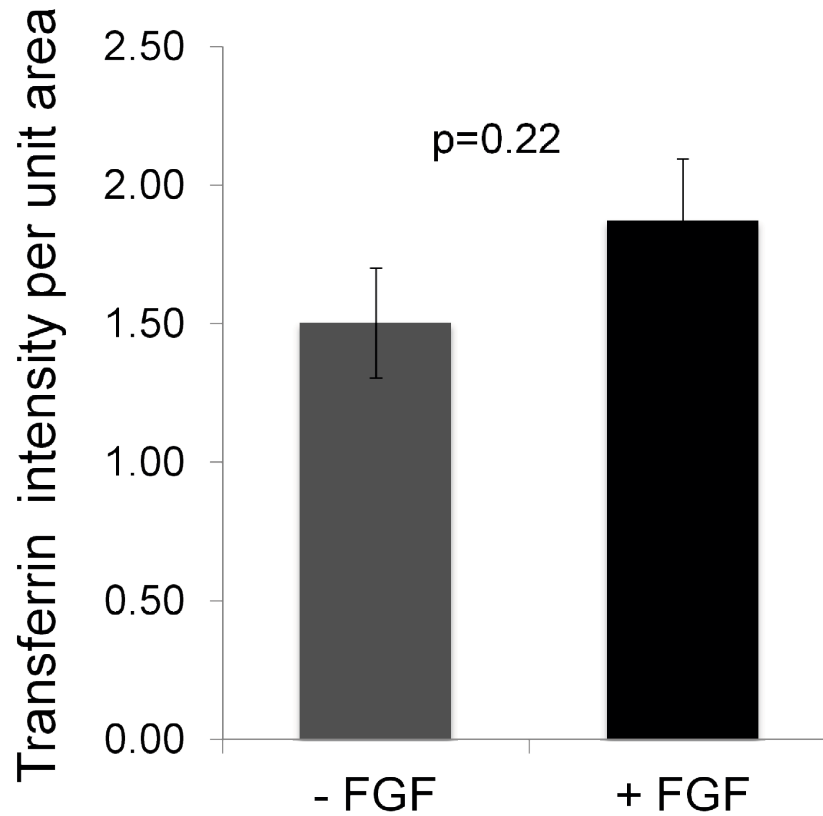

**Fig S3. FGF treatment does not result in an increase in transferrin uptake.** HeLa cells transiently expressing FGFR2-GFP were either stimulated with FGF2 + heparin for 15 minutes, or not stimulated, at 37°C in the presence of transferrin-Alexa-Fluor-546. Cells were then rinsed, fixed and analysed by epifluorescence microscopy. Quantification of transferrin fluorescence intensity demonstrates that FGF stimulation does not induce a significant increase in transferrin entry (mean ± s.e.m.,  $n=49$  cells each condition).

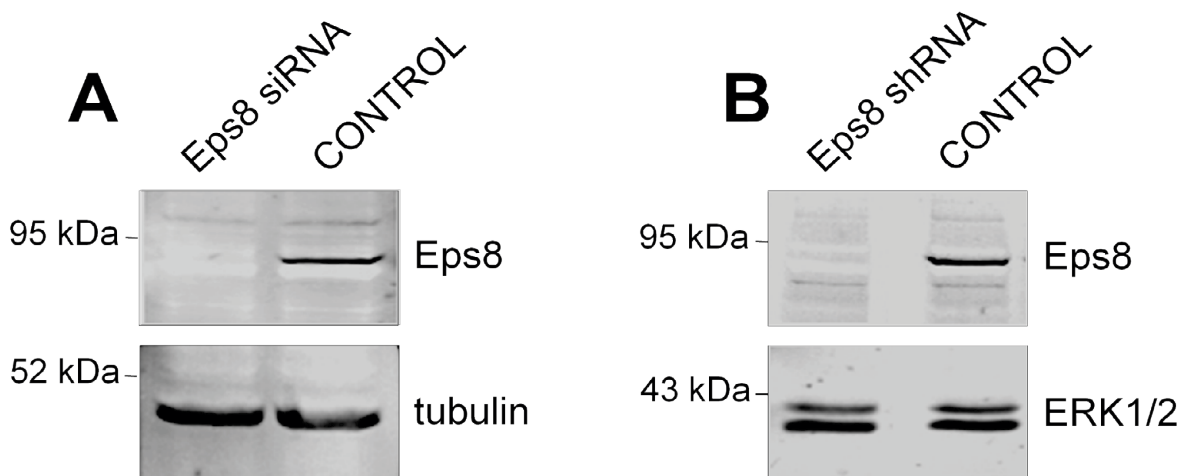

**Fig S4. Eps8 expression is significantly silenced in the Eps8 knock down cell line and in Eps8 siRNA-treated HeLa cells.** Cellular extracts from HeLa cells transfected with Eps8 siRNA (A) or from Eps8 knock down (shRNA) or control vector (control) HeLa cells (B) were resolved by SDS-PAGE and analysed by immunoblotting with anti-Eps8 antibody (mean ± s.e.m.,  $n=3$  experiments).

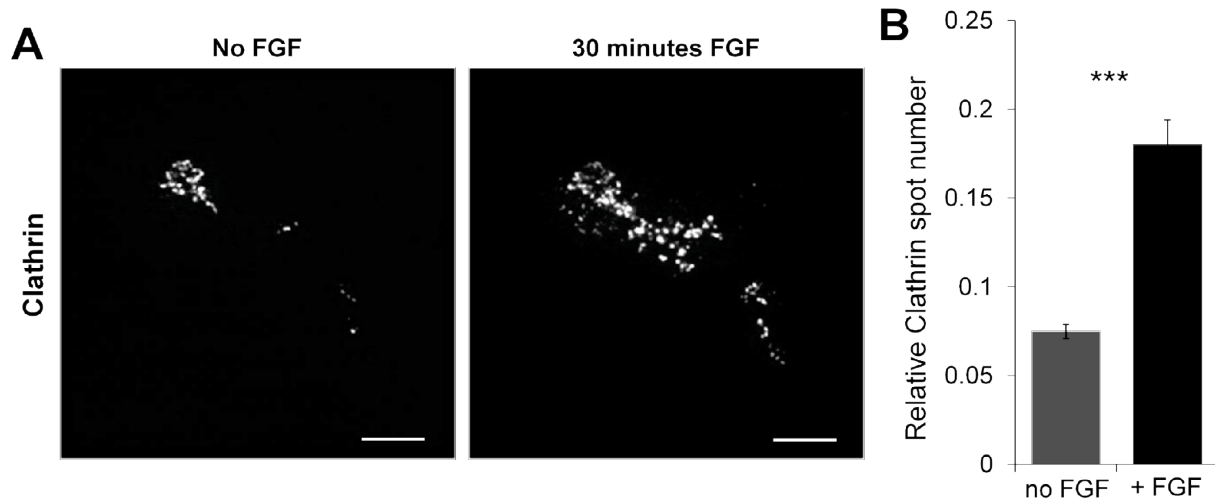

**Fig S5. FGF-dependent peripheral accumulation of CCPs in FGFR-expressing LNCaP cells.** LNCaP cells endogenously expressing FGFR2 and transfected with Clathrin-dsRed were analysed by TIRF microscopy before and 30 minutes after stimulation with FGF2 + heparin. **(A)** Upon FGF stimulation, cells show a significant increase in the number of clathrin spots on the plasma membrane. Scale bars: 5  $\mu$ m. **(B)** Quantification analysis of clathrin spot number before and after FGF stimulation (mean  $\pm$  s.e.m.,  $n=45$  cells; \* $P<0.05$ ; \*\* $P<0.01$ ; \*\*\* $P<0.001$ ).

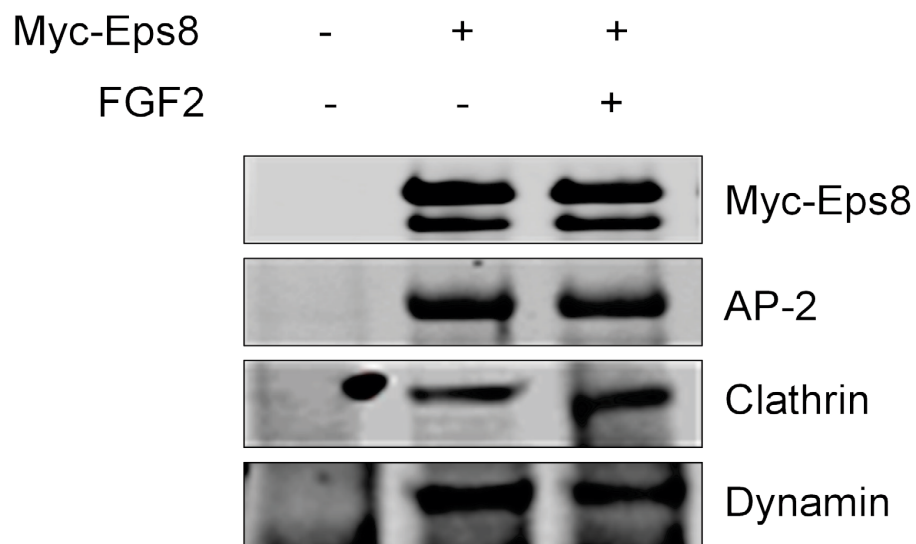

**Fig S6. AP-2, Clathrin, and Dynamin interact with Eps8 in an FGF2-independent manner in HEK293T cells.** Cellular extracts from HEK293T cells transfected with myc-Eps8 (where indicated) and stimulated or not with 20 ng/ml FGF + 10  $\mu$ g/ml heparin for 15 min, were immunoprecipitated with anti-myc antibody, resolved by SDS-PAGE and analysed by immunoblotting for the levels of specified proteins.

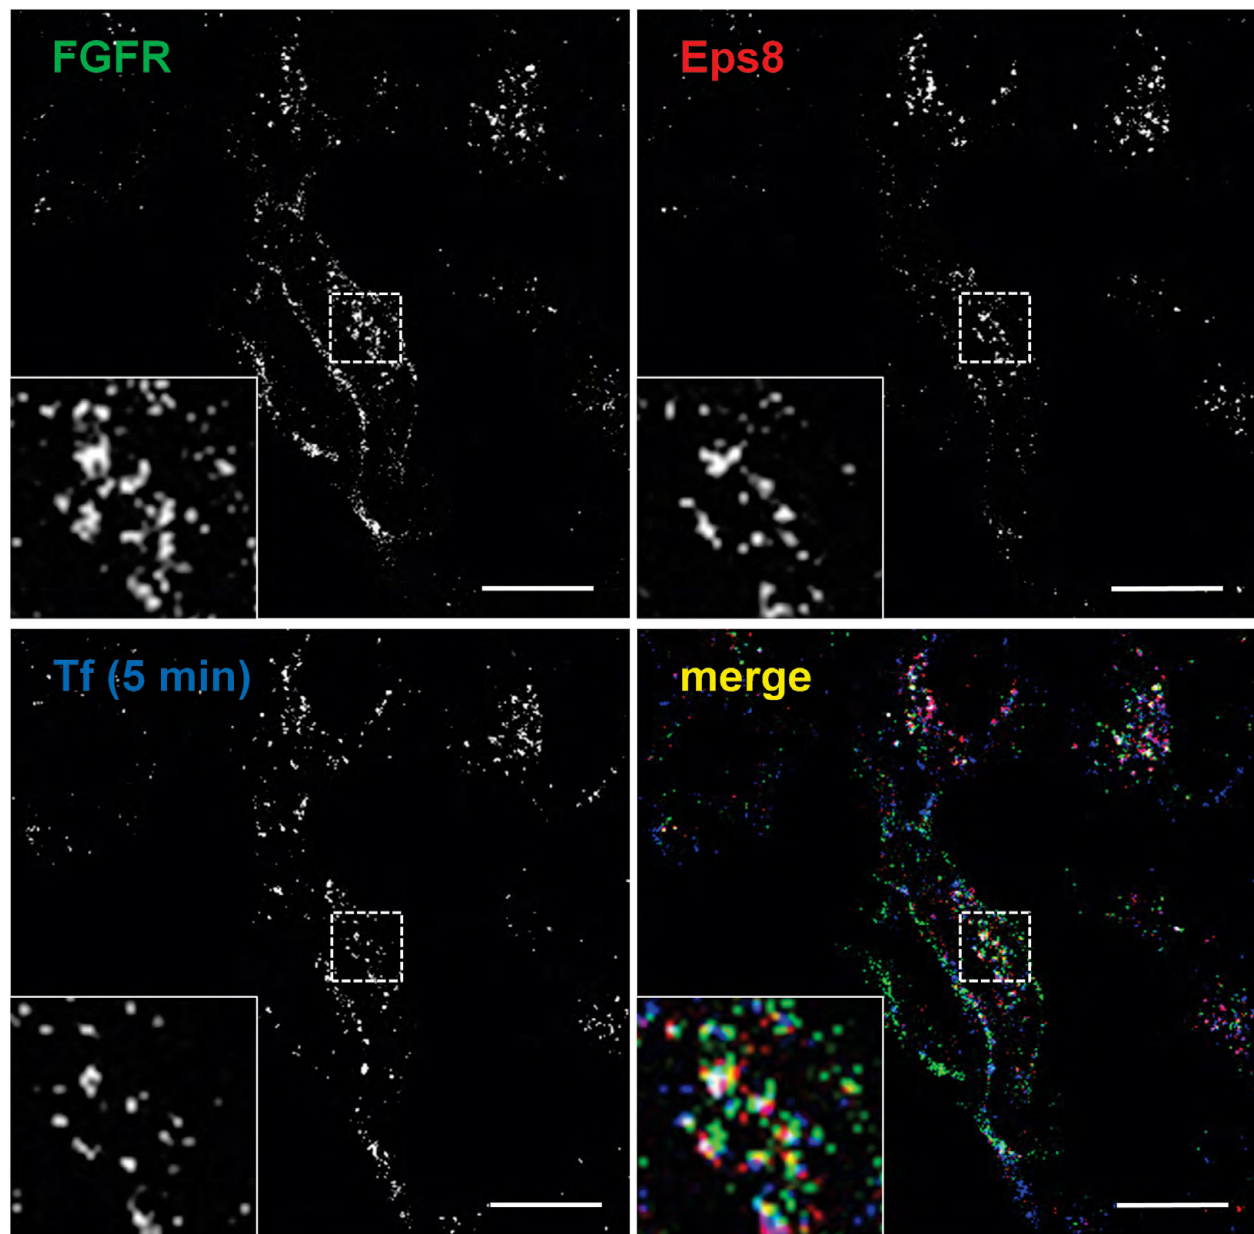

**Fig S7. During early stages of trafficking FGFR colocalises with Eps8 in the early endosomal compartment.** HeLa cells transiently expressing FGFR2-GFP and Eps8-mCherry were stimulated with FGF + heparin for 10 minutes. Following incubation with transferrin-Alexa-Fluor-633 (Tf) during the last 5 minutes of stimulation, cells were rinsed, fixed and analysed by confocal microscopy. Higher-magnification in merged image of selected regions from the cells show overlap of FGFR, Eps8 and 5 min internalized transferrin in white, demonstrating that during the early stages of activation (10 min FGF), FGFR colocalises with Eps8 within the early endocytic compartment. Scale bars=5  $\mu$ m.

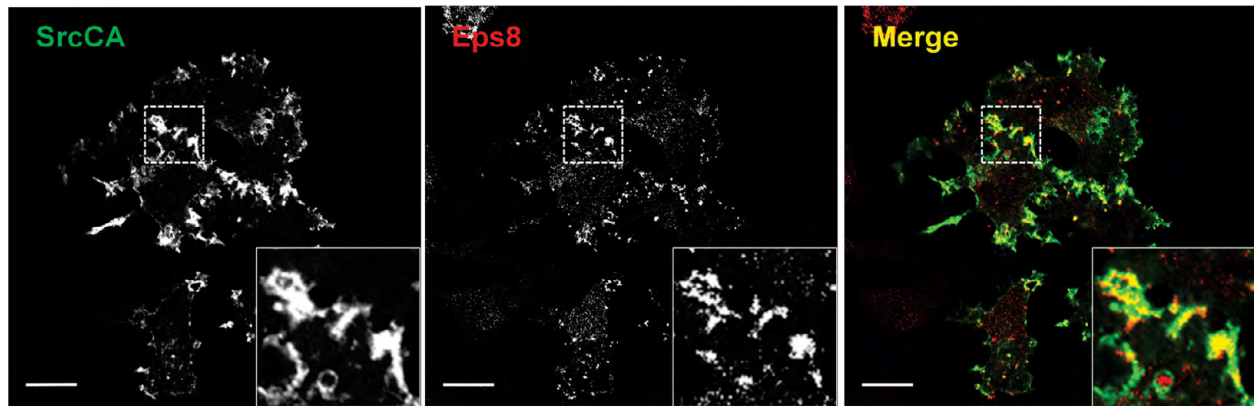

**Fig S8. Colocalisation of Eps8 with active Src.** HeLa cells transiently expressing constitutive active Src (SrcCA) and Eps8-mCherry were immunostained for active Src (P416Src antibody) and imaged in confocal microscopy. Higher-magnification merged image of selected regions from the cells show overlap of active Src and Eps8 in yellow. Scale bars=5  $\mu$ m.

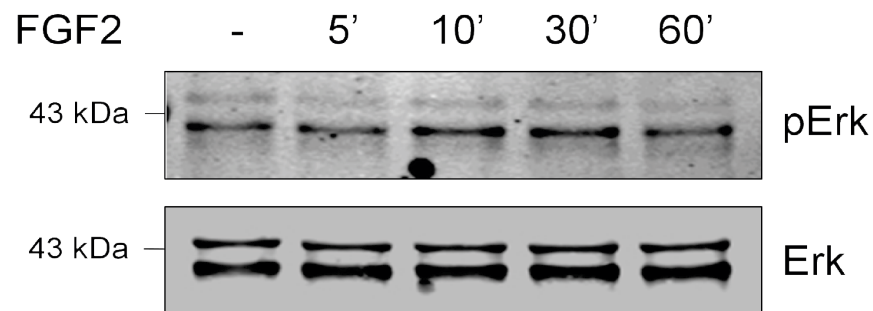

**Fig S9. FGF-dependent kinetics of ERK phosphorylation in non-transfected HeLa cells.** HeLa cells starved overnight in serum-free media were lysed following stimulation with FGF2 + heparin for the indicated times. Cellular extracts were resolved by SDS-PAGE and analysed by immunoblotting for the levels of specified proteins.

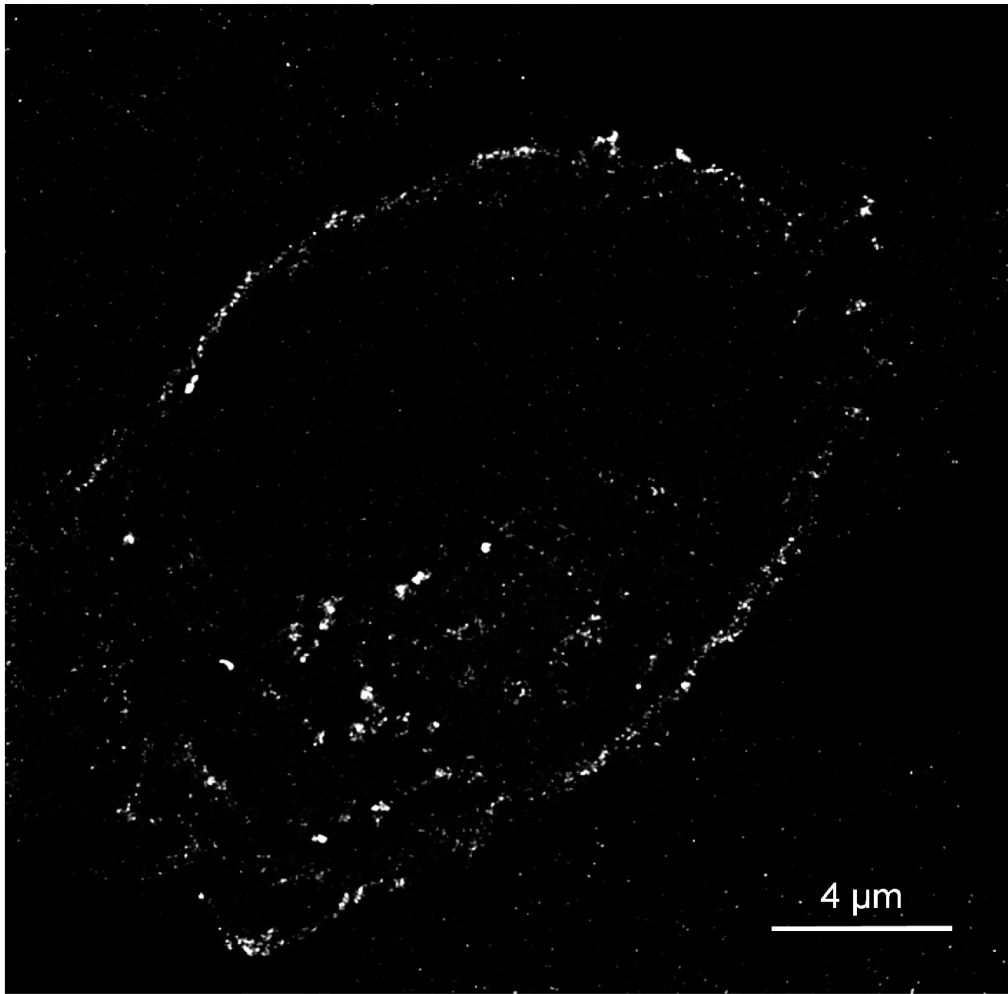

**Fig S10. Super-resolution analysis of FGFR-containing vesicles in Dasatinib-treated HeLa cells.** HeLa cells transiently expressing FGFR2-GFP and incubated for 30 minutes in the presence of Dasatinib inhibitor were stimulated with FGF2 + heparin for 30 minutes, fixed and analysed by super-resolution confocal microscopy on a Leica gSTED system followed by stack deconvolution. The high resolution image reveals the presence of a population of FGFR-containing vesicles accumulating at the cell periphery following Src inhibition.
